# Supplementary material for: The highest connected pure inorganic 3D framework assembled by {P4Mo6} cluster and alkali metal potassium
Source: Royal Society of Chemistry journal article supplement (doi:10.1039/c4ra09388g), 2014-12-04
Supplement: c4ra09388g1.pdf [file c4ra09388g1.pdf]

## Supporting information

# The Highest Connected Pure Inorganic 3D Framework Assembled by {P<sub>4</sub>Mo<sub>6</sub>} Cluster and Alkali Metal Potassium

He Zhang,<sup>a,b</sup> Kai Yu,<sup>a,b\*</sup> Jingshen Li,<sup>a,b</sup> Chunmei Wang,<sup>a,b</sup> Jinghua Lv,<sup>a\*</sup> Zhaoyi Chen,<sup>a,b</sup>  
Honghong Cai,<sup>a,b</sup> Baibin Zhou<sup>a,b\*</sup>,

### 1. Structural figures

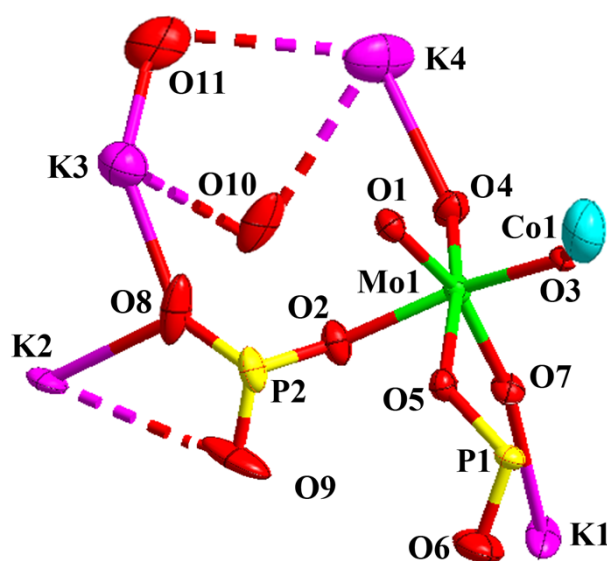

Fig. S1 ORTEP view of the basic units in compound **1** with 50% thermal ellipsoids

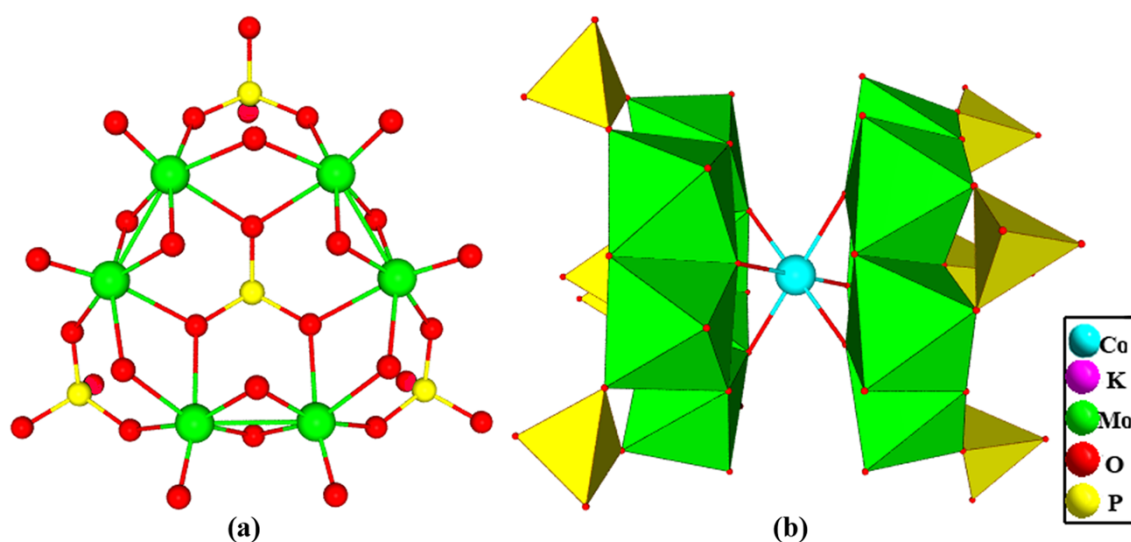

Fig. S2 (a) The basic building unit of [P<sub>4</sub>Mo<sub>6</sub>O<sub>31</sub>]<sup>12-</sup> and (b) and its dimeric sandwich-type cluster {Co(P<sub>4</sub>Mo<sub>6</sub>X<sub>31</sub>)<sub>2</sub>}.

\* Corresponding author: Address: hlyukai188@163.com (K. Yu), zhou\_bai\_bin@163.com (B. B. Zhou)

## 2. Structural data

**Table S1** Selected bond lengths (Å) and bond angles (°) of compound **1**

|                       |            |                       |            |                       |            |
|-----------------------|------------|-----------------------|------------|-----------------------|------------|
| Mo(1)-O(4)            | 1.679(11)  | Mo(1)-O(3)            | 1.945(13)  | Mo(1)-O(1)            | 2.115(11)  |
| Mo(1)-O(7)            | 1.930(10)  | Mo(1)-O(2)            | 2.078(9)   | Mo(1)-O(5)            | 2.282(8)   |
| P(1)-O(5)             | 1.525(15)  | P(1)-O(5)#16          | 1.525(15)  | P(2)-O(8)             | 1.469(18)  |
| P(1)-O(6)             | 1.50(3)    | P(1)-O(5)#4           | 1.552(12)  | P(2)-O(9)             | 1.488(17)  |
| P(2)-O(2)             | 1.535(10)  | P(2)-O(2)#17          | 1.535(10)  |                       |            |
| K(1)-O(7)#3           | 2.719(13)  | K(1)-O(7)             | 2.718(13)  | K(1)-O(2)#3           | 2.712(12)  |
| K(1)-O(2)#2           | 2.712(12)  | K(1)-O(9)#4           | 2.859(12)  | K(1)-O(9)#3           | 2.858(12)  |
| K(2)-O(8)#5           | 2.561(17)  | K(2)-O(8)#6           | 2.561(17)  | K(2)-O(8)#7           | 2.561(17)  |
| K(2)-O(8)#8           | 2.561(17)  | K(2)-O(8)#9           | 2.561(17)  | K(2)-O(8)             | 2.561(17)  |
| K(3)-O(11)#5          | 2.47(3)    | K(3)-O(11)#9          | 2.47(3)    | K(3)-O(11)            | 2.47(3)    |
| K(3)-O(8)#5           | 2.46(2)    | K(3)-O(8)             | 2.46(2)    | K(3)-O(8)#9           | 2.46(2)    |
| K(4)-O(4)#10          | 2.799(11)  | K(4)-O(4)#11          | 2.799(11)  | K(4)-O(4)#12          | 2.799(11)  |
| K(4)-O(4)             | 2.799(11)  | K(4)-O(10)            | 3.23(3)    | K(4)-O(10)#12         | 3.23(3)    |
| Co(1)-O(3)#14         | 2.284(18)  | Co(1)-O(3)#15         | 2.284(18)  | Co(1)-O(3)#4          | 2.284(18)  |
| Co(1)-O(3)            | 2.285(18)  | Co(1)-O(3)#13         | 2.285(18)  | Co(1)-O(3)#16         | 2.285(18)  |
| O(4)-Mo(1)-O(7)       | 105.8(6)   | O(4)-Mo(1)-O(3)       | 101.6(7)   | O(4)-Mo(1)-O(2)       | 94.7(5)    |
| O(4)-Mo(1)-O(1)       | 98.5(6)    | O(4)-Mo(1)-O(5)       | 170.2(5)   | O(6)-P(1)-O(5)#16     | 113.0(7)   |
| O(6)-P(1)-O(5)#4      | 113.0(7)   | O(6)-P(1)-O(5)        | 113.0(7)   | O(6)-P(1)-O(5)#16     | 113.0(7)   |
| O(8)-P(2)-O(2)#17     | 108.7(6)   | O(8)-P(2)-O(2)        | 108.7(6)   | O(8)-P(2)-O(9)        | 116.7(11)  |
| O(3)#14-Co(1)-O(3)#15 | 83.3(6)    | O(3)#14-Co(1)-O(3)#4  | 96.7(6)    | O(3)#15-Co(1)-O(3)#4  | 83.3(6)    |
| O(3)#14-Co(1)-O(3)    | 179.998(1) | O(3)#15-Co(1)-O(3)    | 83.6(4)    | O(3)#4-Co(1)-O(3)     | 96.4(4)    |
| O(3)#14-Co(1)-O(3)#13 | 96.4(4)    | O(3)#15-Co(1)-O(3)#13 | 96.4(4)    | O(3)#4-Co(1)-O(3)#13  | 83.6(4)    |
| O(3)-Co(1)-O(3)#13    | 83.6(4)    | O(3)#14-Co(1)-O(3)#16 | 83.6(4)    | O(3)#15-Co(1)-O(3)#16 | 83.6(4)    |
| O(3)#4-Co(1)-O(3)#16  | 96.4(4)    | O(3)-Co(1)-O(3)#16    | 96.4(4)    | O(3)#13-Co(1)-O(3)#16 | 180.0(6)   |
| O(7)#3-K(1)-O(7)      | 120.4(5)   | O(7)#3-K(1)-O(2)#3    | 61.0(2)    | O(7)-K(1)-O(2)#3      | 176.2(4)   |
| O(7)#3-K(1)-O(2)#2    | 176.2(4)   | O(7)-K(1)-O(2)#2      | 61.0(2)    | O(7)#3-K(1)-O(9)#4    | 125.6(5)   |
| O(7)-K(1)-O(9)#4      | 102.8(5)   | O(7)#3-K(1)-O(9)#3    | 102.9(5)   | O(7)-K(1)-O(9)#3      | 125.5(5)   |
| O(8)#5-K(2)-O(8)#6    | 107.4(10)  | O(8)#5-K(2)-O(8)#7    | 107.4(10)  | O(8)#6-K(2)-O(8)#7    | 72.6(10)   |
| O(8)#5-K(2)-O(8)#8    | 180.0(4)   | O(8)#6-K(2)-O(8)#8    | 72.6(10)   | O(8)#7-K(2)-O(8)#8    | 72.6(10)   |
| O(8)#5-K(2)-O(8)#9    | 72.6(10)   | O(8)#6-K(2)-O(8)#9    | 107.4(10)  | O(8)#7-K(2)-O(8)#9    | 179.999(4) |
| O(8)#8-K(2)-O(8)#9    | 107.4(10)  | O(8)#5-K(2)-O(8)      | 72.6(10)   | O(8)#6-K(2)-O(8)      | 179.999(2) |
| O(8)#7-K(2)-O(8)      | 107.4(10)  | O(8)#8-K(2)-O(8)      | 107.4(10)  | O(8)#9-K(2)-O(8)      | 72.6(10)   |
| O(11)#5-K(3)-O(11)#9  | 79.5(9)    | O(11)#5-K(3)-O(11)    | 79.5(9)    | O(11)#9-K(3)-O(11)    | 79.5(9)    |
| O(11)#5-K(3)-O(8)#5   | 88.6(8)    | O(11)#9-K(3)-O(8)#5   | 137.7(3)   | O(11)-K(3)-O(8)#5     | 138.1(3)   |
| O(11)#5-K(3)-O(8)     | 137.7(3)   | O(11)#9-K(3)-O(8)     | 138.1(3)   | O(11)-K(3)-O(8)       | 88.6(8)    |
| O(4)#10-K(4)-O(4)#11  | 76.7(4)    | O(4)#10-K(4)-O(4)#12  | 179.999(1) | O(4)#11-K(4)-O(4)#12  | 103.3(4)   |
| O(4)#10-K(4)-O(4)     | 103.3(4)   | O(4)#11-K(4)-O(4)     | 179.999(1) | O(4)#12-K(4)-O(4)     | 76.7(4)    |

## 3. Physical characterization

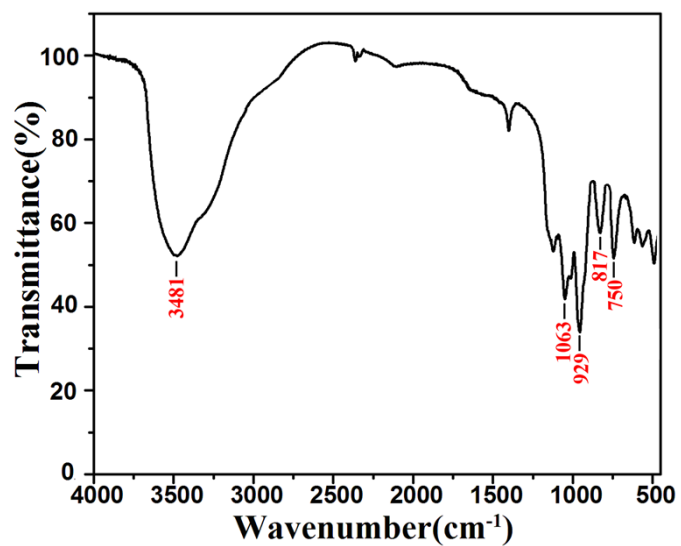

Fig. S3 IR spectra of compound 1.

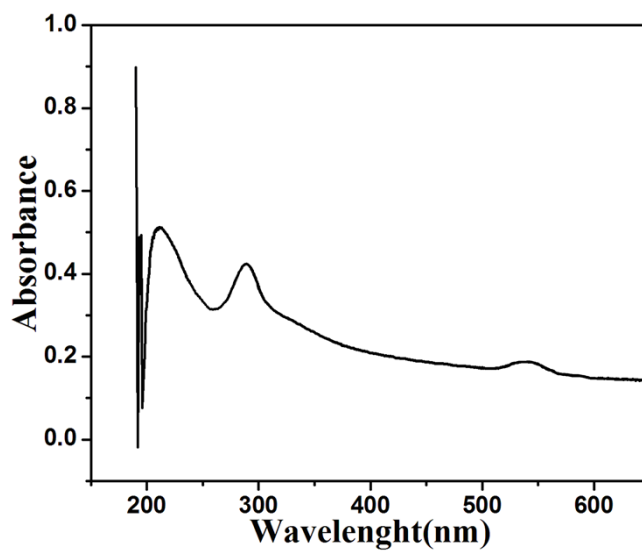

Fig. S4 Solid state UV-vis spectra of compound 1

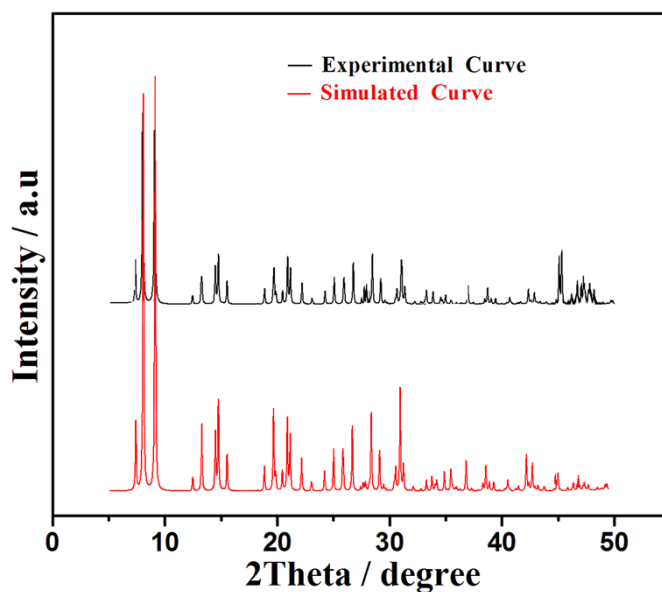

Fig. S5 The PXRD contrast curves of 1.

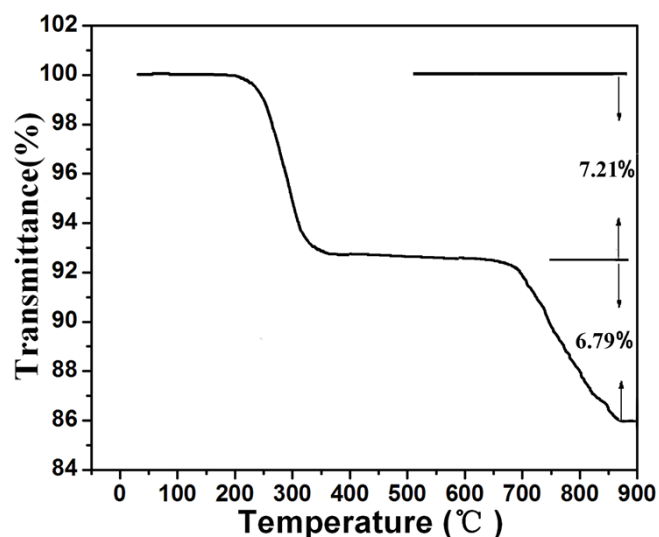

Fig. S6 TG curve of compound 1.

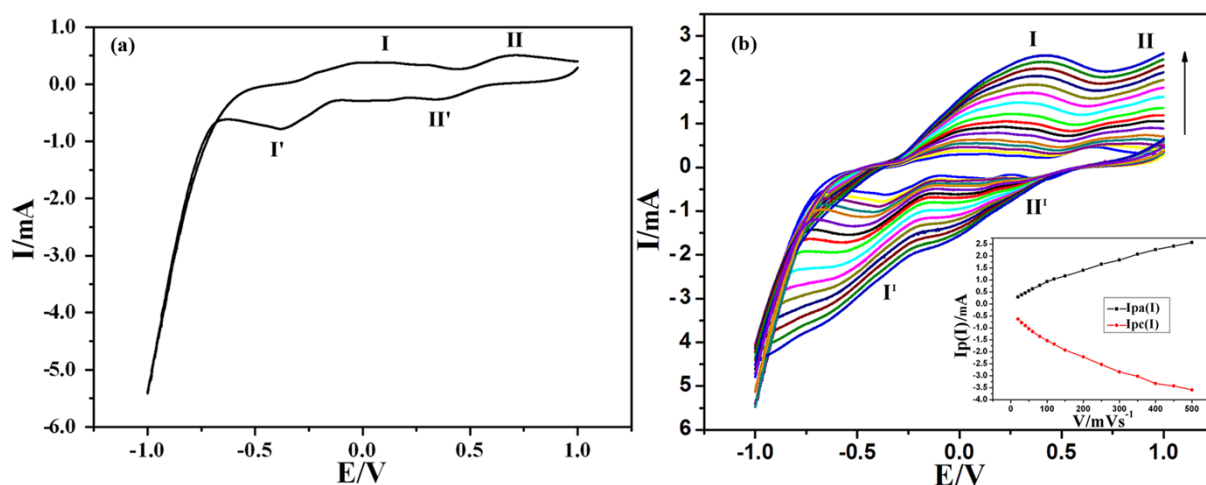

Fig. S7 (a) The CV of 1-CPE in 1.0 M  $\text{H}_2\text{SO}_4$  solution. Scan rate:  $20 \text{ mV}\cdot\text{s}^{-1}$ ; (b) Cyclic voltammograms of the 1-CPE in 1.0 M  $\text{H}_2\text{SO}_4$  aqueous solution at different scan rates (from inner to outer: 20, 30, 40, 50, 60, 80, 100, 120, 150, 200, 250, 300, 350, 400, 450, 500  $\text{mV}\cdot\text{s}^{-1}$ ) in the potential range of +1.0 to -1.0 V. The inset shows plots of the anodic and the cathodic peak currents for II against scan rates. Potentials vs. Ag/AgCl. The arrows represent the direction of scan for anodic peak.

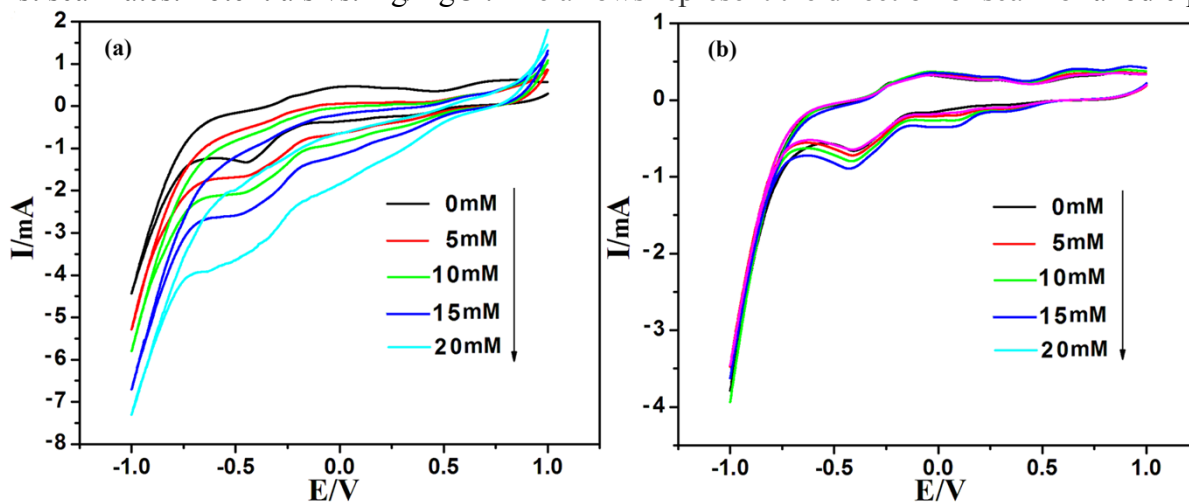

Fig. S8 Reduction of  $\text{H}_2\text{O}_2$  (a) and  $\text{ClO}_3^-$  (b) for 1-CPE in 1 M  $\text{H}_2\text{SO}_4$  solution containing  $\text{H}_2\text{O}_2$  or  $\text{ClO}_3^-$ . Scan rate:  $50 \text{ mV}\cdot\text{s}^{-1}$ . Potentials vs. Ag/AgCl.

#### 4. The original TOPOS result of the topological analysis

#####

1:K0.909

#####

Topology for K1

Atom K1 links by bridge ligands and has

Common vertex with

R(A-A)

|      |        |        |        |          |        |   |
|------|--------|--------|--------|----------|--------|---|
| Co 1 | 0.0000 | 0.0000 | 0.0000 | ( 0 0 0) | 7.252A | 1 |
| Co 1 | 0.6667 | 0.3333 | 0.3333 | ( 0 0 0) | 7.252A | 1 |

Topology for K2

-----

Atom K2 links by bridge ligands and has

Common vertex with

R(A-A)

|      |         |        |        |          |        |   |
|------|---------|--------|--------|----------|--------|---|
| K 3  | 0.3333  | 0.6667 | 0.0657 | ( 0 0 0) | 3.634A | 1 |
| K 3  | 0.3333  | 0.6667 | 0.2676 | ( 0 0 0) | 3.634A | 1 |
| Co 1 | 1.0000  | 1.0000 | 0.0000 | ( 1 1 0) | 9.758A | 1 |
| Co 1 | 0.0000  | 1.0000 | 0.0000 | ( 0 1 0) | 9.758A | 1 |
| Co 1 | 0.0000  | 0.0000 | 0.0000 | ( 0 0 0) | 9.758A | 1 |
| Co 1 | 0.6667  | 1.3333 | 0.3333 | ( 0 1 0) | 9.758A | 1 |
| Co 1 | 0.6667  | 0.3333 | 0.3333 | ( 0 0 0) | 9.758A | 1 |
| Co 1 | -0.3333 | 0.3333 | 0.3333 | (-1 0 0) | 9.758A | 1 |

Topology for K3

-----

Atom K3 links by bridge ligands and has

Common vertex with

R(A-A)

|      |        |        |        |          |        |   |
|------|--------|--------|--------|----------|--------|---|
| K 2  | 0.3333 | 0.6667 | 0.1667 | ( 0 0 0) | 3.634A | 1 |
| Co 1 | 1.0000 | 1.0000 | 0.0000 | ( 1 1 0) | 8.052A | 1 |
| Co 1 | 0.0000 | 1.0000 | 0.0000 | ( 0 1 0) | 8.052A | 1 |
| Co 1 | 0.0000 | 0.0000 | 0.0000 | ( 0 0 0) | 8.052A | 1 |

Topology for K4

-----

Atom K4 links by bridge ligands and has

Common vertex with

R(A-A)

|      |        |        |        |          |        |   |
|------|--------|--------|--------|----------|--------|---|
| Co 1 | 1.0000 | 1.0000 | 0.0000 | ( 1 1 0) | 6.666A | 1 |
| Co 1 | 0.0000 | 0.0000 | 0.0000 | ( 0 0 0) | 6.666A | 1 |

Topology for Co1

-----

Atom Co1 links by bridge ligands and has

Common vertex with

R(A-A)

|     |         |         |        |          |        |   |
|-----|---------|---------|--------|----------|--------|---|
| K 4 | 0.5000  | 0.5000  | 0.0000 | ( 0 0 0) | 6.666A | 1 |
| K 4 | -0.5000 | -0.5000 | 0.0000 | (-1-1 0) | 6.666A | 1 |
| K 4 | 0.5000  | 0.0000  | 0.0000 | ( 1 0 0) | 6.666A | 1 |
| K 4 | -0.5000 | 0.0000  | 0.0000 | ( 0 0 0) | 6.666A | 1 |
| K 4 | 0.0000  | 0.5000  | 0.0000 | ( 0 1 0) | 6.666A | 1 |

|     |         |         |         |            |        |   |
|-----|---------|---------|---------|------------|--------|---|
| K 4 | 0.0000  | -0.5000 | 0.0000  | ( 0 0 0)   | 6.666A | 1 |
| K 1 | 0.3333  | 0.0659  | 0.1667  | ( 0 0 0)   | 7.252A | 1 |
| K 1 | -0.0659 | 0.2674  | 0.1667  | ( 0 0 0)   | 7.252A | 1 |
| K 1 | -0.2674 | -0.3333 | 0.1667  | ( 0 0 0)   | 7.252A | 1 |
| K 1 | 0.2674  | -0.0659 | -0.1667 | ( 0 0 0)   | 7.252A | 1 |
| K 1 | -0.3333 | -0.2674 | -0.1667 | ( 0 0 0)   | 7.252A | 1 |
| K 1 | 0.0659  | 0.3333  | -0.1667 | ( 0 0 0)   | 7.252A | 1 |
| K 1 | -0.3333 | -0.0659 | -0.1667 | ( 0 0 0)   | 7.252A | 1 |
| K 1 | 0.0659  | -0.2674 | -0.1667 | ( 0 0 0)   | 7.252A | 1 |
| K 1 | 0.2674  | 0.3333  | -0.1667 | ( 0 0 0)   | 7.252A | 1 |
| K 1 | -0.2674 | 0.0659  | 0.1667  | ( 0 0 0)   | 7.252A | 1 |
| K 1 | 0.3333  | 0.2674  | 0.1667  | ( 0 0 0)   | 7.252A | 1 |
| K 1 | -0.0659 | -0.3333 | 0.1667  | ( 0 0 0)   | 7.252A | 1 |
| K 3 | 0.3333  | 0.6667  | 0.0657  | ( 0 0 0)   | 8.052A | 1 |
| K 3 | 0.3333  | -0.3333 | 0.0657  | ( 0 -1 0)  | 8.052A | 1 |
| K 3 | -0.6667 | -0.3333 | 0.0657  | ( -1 -1 0) | 8.052A | 1 |
| K 3 | 0.6667  | 0.3333  | -0.0657 | ( 1 1 0)   | 8.052A | 1 |
| K 3 | -0.3333 | 0.3333  | -0.0657 | ( 0 1 0)   | 8.052A | 1 |
| K 3 | -0.3333 | -0.6667 | -0.0657 | ( 0 0 0)   | 8.052A | 1 |
| K 2 | 0.3333  | 0.6667  | 0.1667  | ( 0 0 0)   | 9.758A | 1 |
| K 2 | 0.3333  | -0.3333 | 0.1667  | ( 0 -1 0)  | 9.758A | 1 |
| K 2 | -0.6667 | -0.3333 | 0.1667  | ( -1 -1 0) | 9.758A | 1 |
| K 2 | 0.6667  | 0.3333  | -0.1667 | ( 1 1 0)   | 9.758A | 1 |
| K 2 | -0.3333 | 0.3333  | -0.1667 | ( 0 1 0)   | 9.758A | 1 |
| K 2 | -0.3333 | -0.6667 | -0.1667 | ( 0 0 0)   | 9.758A | 1 |

-----  
Structural group analysis  
-----

-----  
Structural group No 1  
-----

Structure consists of 3D framework with K and Co

Coordination sequences  
-----

|     |   |    |    |     |     |      |      |      |      |      |
|-----|---|----|----|-----|-----|------|------|------|------|------|
| K1: | 1 | 2  | 3  | 4   | 5   | 6    | 7    | 8    | 9    | 10   |
| Num | 2 | 55 | 34 | 450 | 104 | 1220 | 214  | 2366 | 364  | 3888 |
| Cum | 3 | 58 | 92 | 542 | 646 | 1866 | 2080 | 4446 | 4810 | 8698 |

|     |   |     |     |     |     |      |      |      |      |       |
|-----|---|-----|-----|-----|-----|------|------|------|------|-------|
| K2: | 1 | 2   | 3   | 4   | 5   | 6    | 7    | 8    | 9    | 10    |
| Num | 8 | 132 | 50  | 618 | 132 | 1480 | 254  | 2718 | 416  | 4332  |
| Cum | 9 | 141 | 191 | 809 | 941 | 2421 | 2675 | 5393 | 5809 | 10141 |

|     |   |    |    |     |     |      |     |      |     |      |
|-----|---|----|----|-----|-----|------|-----|------|-----|------|
| K3: | 1 | 2  | 3  | 4   | 5   | 6    | 7   | 8    | 9   | 10   |
| Num | 4 | 79 | 91 | 484 | 246 | 1229 | 477 | 2314 | 784 | 3739 |



Total Schlafli symbol:  $\{3^3;4^3\}2\{3^6;4^{12};5^6;6^4\}\{3^6;4^{84};5^{36};6^{213};7^{27};8^{69}\}\{4\}9$   
2,4,8,30-c net with stoichiometry  $(2-c)9(4-c)2(8-c)(30-c)$ ; 5-nodal net

New topology, please, contact the authors (62077 types in 9 databases)

Elapsed time: 16.18 sec.
